# Supplementary material for: Biological variation of cardiac biomarkers in athletes during an entire sport season
Source: publisher site journal article supplement (doi:10.1515/cclm-2024-1203), 2025-01-27
Supplement: Supplementary file 1 [file j_cclm-2024-1203_suppl_001.docx]

**Supplementary Material**

**Supplementary Material Table S1. Analytical performance of the assays.**

| **Measurand** | **LoD** | **LoQ** | **CV% IQC level 1**  **(mean concentration)** | **CV% IQC level 2**  **(mean concentration)** |
| --- | --- | --- | --- | --- |
| BNP | 4.0 ng/L | 6.0 ng/L | 2.7%  (213.0 ng/L) | 3.4%  (1114.2 ng/L) |
| CK-MB | 0.3 ng/mL | 1.0 ng/mL | 3.8%  (67.3 ng/mL) | NA |
| Myoglobin | 0.5 ng/mL | 1.0 ng/mL | 5.2%  (40.5 ng/mL) | NA |
| NT-proBNP | 5.0 ng/L | 10.0 ng/L | 6.6%  (226.4 ng/L) | 3.5%  (800.9 ng/L) |
| hs-cTnI | 1.3 ng/L | 2.5 ng/L | 3.9%  (37.0 ng/L) | 2.7%  (5486.0 ng/L) |

LoD and LoQ are as reported by manufacturers. The reproduciblity expressed as CV% was obtained during the study for each level of IQC concentration. Only one IQC level for CK-MB and Myoglobin was processed.

LoD, Limit of Detection; LoQ: Limit of Quantification; CV, coefficient of variation; BNP, brain natriuretic peptide; CK-MB, creatine kinase- myocardial band; NT-proBNP, N-terminal brain natriuretic pro-peptide; hs-cTnI, high-sensitivity cardiac troponin I; NA, Not Applicable.

**Supplementary Material Table S2. Comparison of biomarker concentrations between genders.**

| **Measurand** | **Median (Female)** | **IQR** | **Median (Male)** | **IQR** | **P-value (Sex). Mann Whitney** |
| --- | --- | --- | --- | --- | --- |
| BNP  (ng/L) | 41.1 | 34.2-61.4 | 33.3 | 23.8-43.0 | *P*<0.001 |
| CK-MB  (ng/mL) | 2.5 | 1.7-2.9 | 3.7 | 2.7-4.7 | *P*<0.001 |
| Myoglobin (ng/mL) | 20.3 | 14.9-28.8 | 31.1 | 23.4-39.2 | *P*<0.001 |
| NT-proBNP (ng/L) | 67.2 | 50.9-80.8 | 45.5 | 34.2-56.9 | *P*<0.001 |
| hs-cTnI  (ng/L) | 4.6 | 2.8-20.6 | 13.0 | 7.2-46.8 | *P*<0.001 |

IQR, interquartile range; BNP, brain natriuretic peptide; CK-MB, creatine kinase- myocardial band; NT-proBNP, N-terminal brain natriuretic pro-peptide; hs-cTnI, high-sensitivity cardiac troponin I.

**Supplementary Material Table S3. Comparison of biomarker concentrations based on exercise within the 24h before sampling.**

| **Measurand** | **Median**  **(No exercise 24h)** | **IQR** | **Median**  **(Yes exercise 24h)** | **IQR** | **P-value (Sex). Mann Whitney** |
| --- | --- | --- | --- | --- | --- |
| BNP  (ng/L) | 37.3 | 30.2-53.7 | 37.4 | 29.8-47.9 | *P*=0.443 |
| CK-MB  (ng/mL) | 2.5 | 1.8-3.1 | 3.6 | 2.6-4.7 | *P*<0.001 |
| Myoglobin (ng/mL) | 24.2 | 17.4-31.7 | 28.6 | 19.2-39.5 | *P*<0.001 |
| NT-proBNP (ng/L) | 61.2 | 38.4-73.7 | 55.0 | 37.7-73.0 | *P*=0.125 |
| hs-cTnI  (ng/L) | 4.8 | 3.4-13.3 | 14.8 | 6.0-65.7 | *P*<0.001 |

IQR, interquartile range; BNP, brain natriuretic peptide; CK-MB, creatine kinase- myocardial band; NT-proBNP, N-terminal brain natriuretic pro-peptide; hs-cTnI, high-sensitivity cardiac troponin I.
